# Supplementary material for: The Impact of Labor Education Participation on University Students' Subjective Well-being: The Chain Mediating Roles of Meaning In Life and Resilience
Source: Research Square preprint supplement (doi:10.21203/rs.3.rs-8033516/v1), 2025-12-02
Supplement: Supplementary file 1 [file 11f7041bf84137f66fd28f3b.docx]

Sichuan Psychological Society


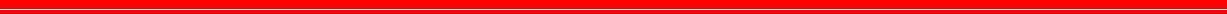


psychological society No·【2022】029

Approval of the Ethics Committee of Sichuan Psychological Association

| Project Name | Research on the social development and "fatigue" psychology of college students | | |
| --- | --- | --- | --- |
| Application Unit | Chengdu University of Traditional Chinese Medicine,  Southwest University of Finance and Economics | | |
| Responsible for the Project | Fan Wenshu | Professional title | Lecturer |
| Major Researchr | Du Juan，Luo Wenping，Lei Peng ect. | | |
| Review the Documents | 1. Application form for scientific research ethics review; 2. The resume of the person in charge of psychological research; 3. Brief list of participants; 4. Research program: 5. Confidentiality agreement: 6. Questionnaire. | | |
| Review Method | □ Review of the meeting ☑Communication review | | |
| Review of the Meeting | Time： Location： | | |
| Attendence of the meeting： Avoidence： | | |
| Review opinions | The researcher's materials are complete, the researcher's qualifications are qualified, and the conditions for research ability are met: the research program of the project is reasonably designed, the content of the program meets the relevant scientific research requirements and relevant ethical requirements, and it is agreed that the project is carried out.  During the research process, it will be subject to follow-up review by the ethics committee. The frequency of follow-up review is 12 times from the date of research approval. Please submit the follow-up review application form and related documents one month before the expiration of the follow-up review, or stop the investigation and research.  The signature of the chairman:  Stamped by the committee (unit's seal)  December 16, 2022 | | |
| Explaination | 1. Researchers must implement it in accordance with the research plan approved by the ethics committee, and avoid relevant national laws and regulations during the implementation.  2. The researcher shall notify the ethics committee in time to re-examine the approved research program, any modification of the informed consent form and the replacement of the main researcher, and implement it after approval.  3. From the date of approval by the ethics committee, if the research period is more than one year, it will be subject to follow-up review by the ethics committee. The follow-up review frequency is to submit a research progress report to the ethics committee every 12 months.  4. Please submit the research summary report to the Psychological Research Ethics Committee of the Sichuan Psychological Association within January after the end of the study. | | |

Address of the Ethics Committee: No. 99, East Section of Haike Road, Wenjiang District, Chengdu City, Sichuan Province. Postal Code: 611130

E-mail address of the ethics committee: <Scsxlxh@163.com;>

Contact: Hu Jingxuan; Contact number:028-66775250
